# Supplementary material for: Detection of Temperature Difference in Neuronal Cells
Source: PubMed Central journal article supplement (PMC4772094; doi:10.1038/srep22071), 2016-03-01
Supplement: srep22071-s1.pdf [file srep22071-s1.pdf]

# Supplemental Data of

---

## Detection of Temperature Difference in Neuronal Cells

**Ryuichi Tanimoto<sup>1</sup>, Takumi Hiraiwa<sup>1</sup>, Yuichiro Nakai<sup>1</sup>, Yutaka Shindo<sup>1</sup>, Kotaro Oka<sup>1</sup>, Noriko Hiroi<sup>1,\*</sup>, and Akira Funahashi<sup>1</sup>**

<sup>1</sup>Keio University, Department of Biosciences and Informatics, 3-14-1, Hiyoshi, Kohoku-Ward, Yokohama, 223-8522, Japan

\* hiroi@bio.keio.ac.jp

---

### contents:

**Cover page**

**page 1**

**Figure S1**

**Figure S2**

**page 2**

**Figure S3**

**page 3**

**Figure S4**

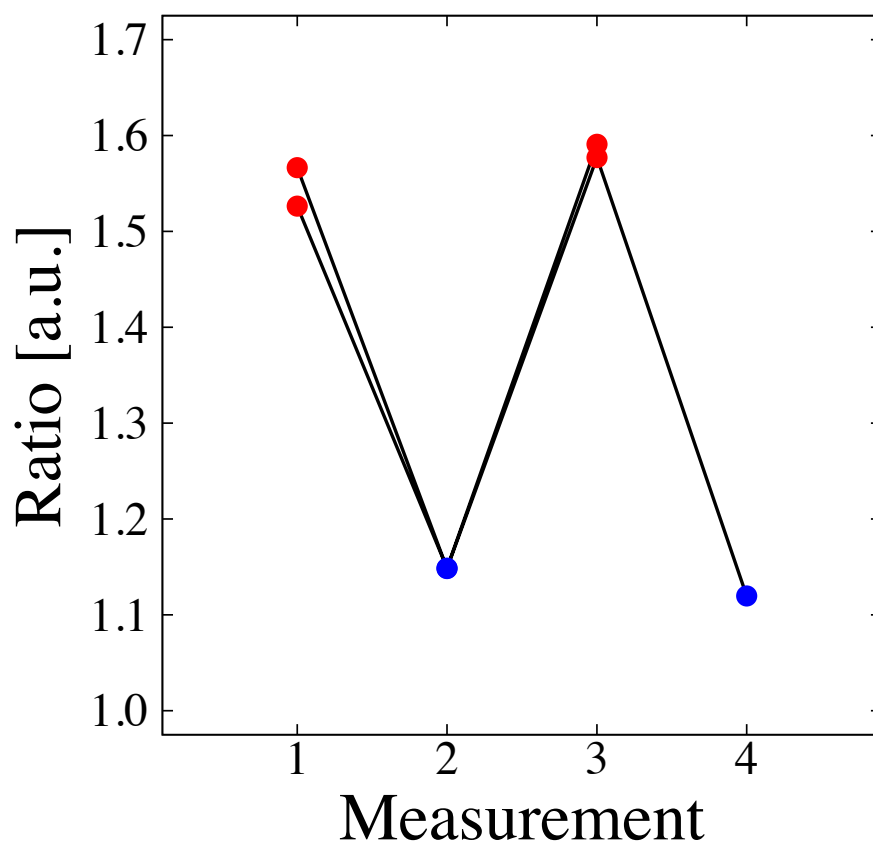

**Figure S1.** Representative reversibility of the fluorescence intensity ratio of quantum dots to temperature. Red and blue dots indicate the mean value of fluorescence intensity ratio at 40°C and 30°C. All plots were calibrated by the photobleaching curve.

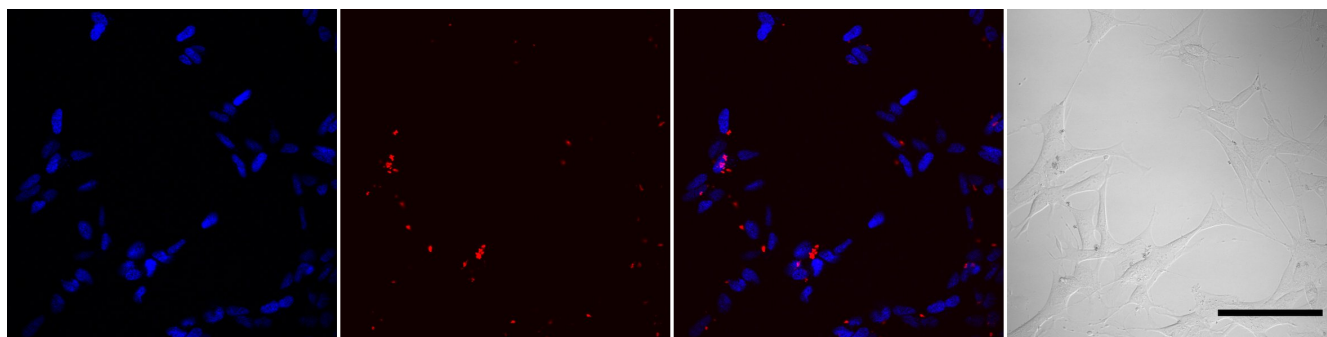

**Figure S2.** Fluorescence images of SH-SY5Y cells incorporating quantum dots. Blue: DNA. Red: Quantum dots. Most right is the phase contrast image. Scale bar represents 100  $\mu\text{m}$ .

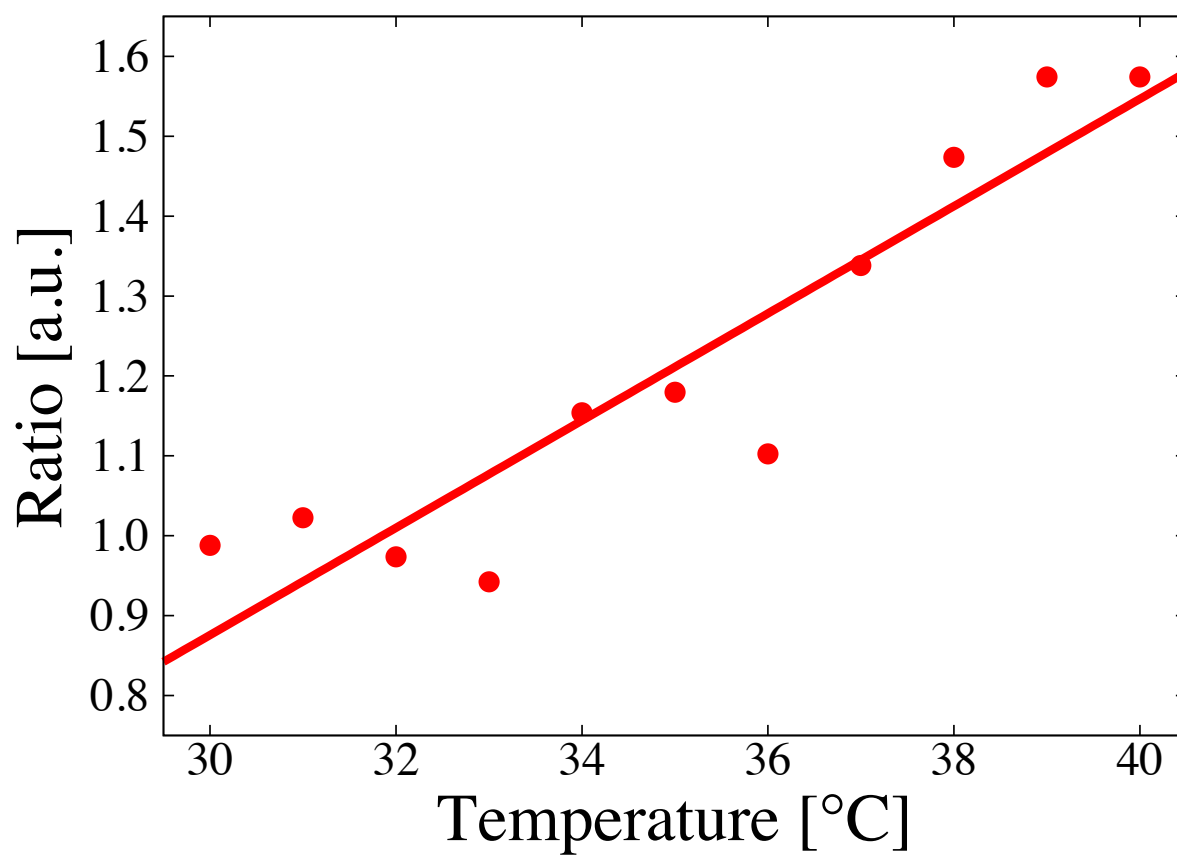

**Figure S3.** A correlation between the fluorescence intensity ratio of single quantum dot inside SH-SY5Y cell and ambient temperature. Slope is  $0.067/^{\circ}\text{C}$  and  $r^2 = 0.86$ .

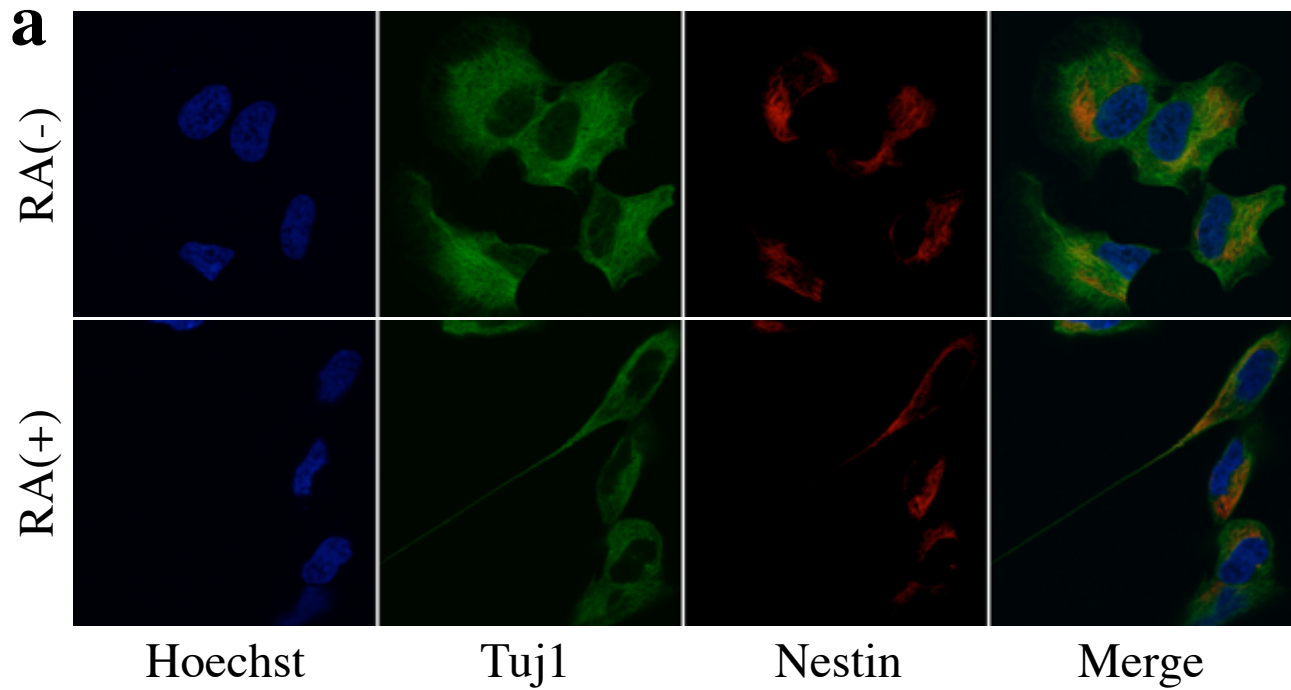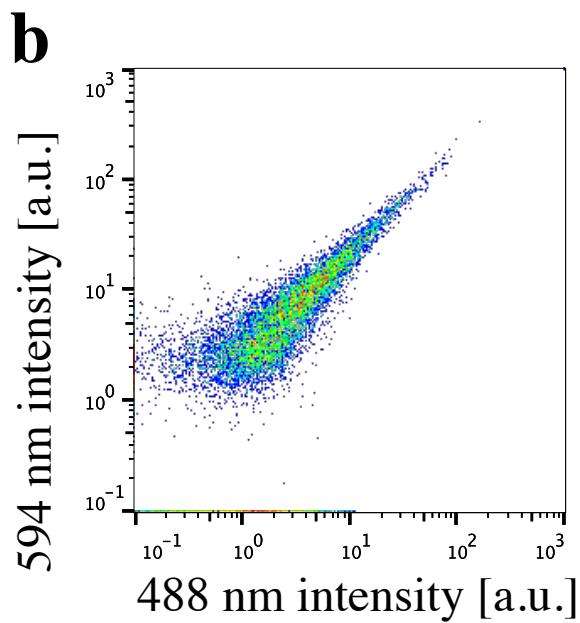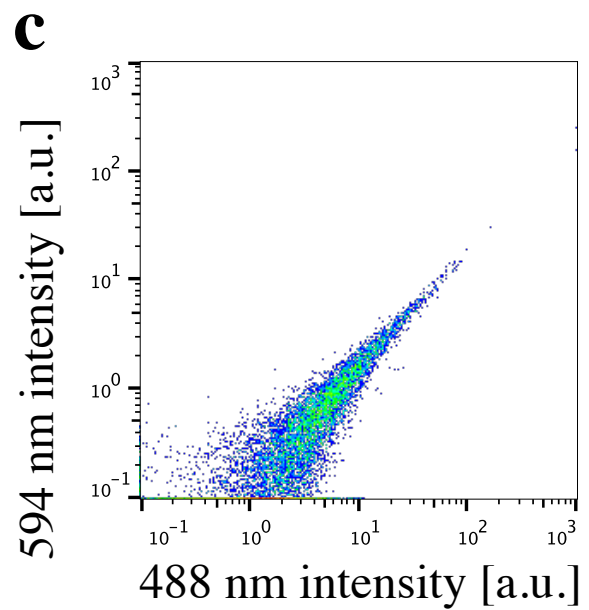

**Figure S4.** Neuronal differentiation of SH-SY5Y cells. (a) Confocal fluorescence images of SH-SY5Y cells before and after the treatment with 13-*cis* retinoic acid. Fluorescence of DNA (blue), Tuj1 (green) and Nestin (red) are shown. Scale bar represents 20  $\mu\text{m}$ . (b, c) The expression profile of RA<sub>-</sub> (b) and RA<sub>+</sub> (c) analyzed by flow cytometry. The horizontal axis indicates the expression level of Tuj1, and the vertical axis Nestin.
